# Supplementary material for: Systematic Investigation of the Effect of Lactobacillus acidophilus TW01 on Potential Prevention of Particulate Matter (PM)2.5-Induced Damage Using a Novel In Vitro Platform
Source: MDPI journal article supplement (doi:10.3390/foods12173278), 2023-09-01
Supplement: s1 [file s1]

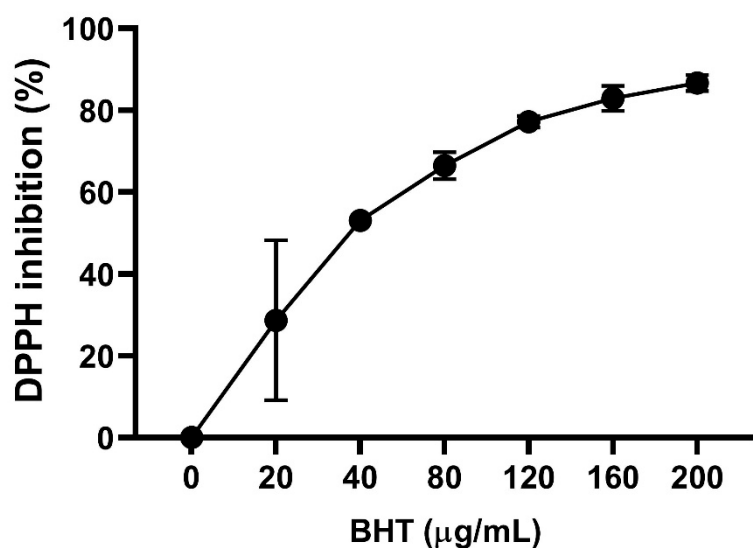

**Figure S1.** The butylated hydroxytoluene (BHT) standard curve for antioxidant assay (DPPH assay). The IC<sub>50</sub> of BHT is 71.90 µg/mL. The data are presented as mean ± SD (n = 2).

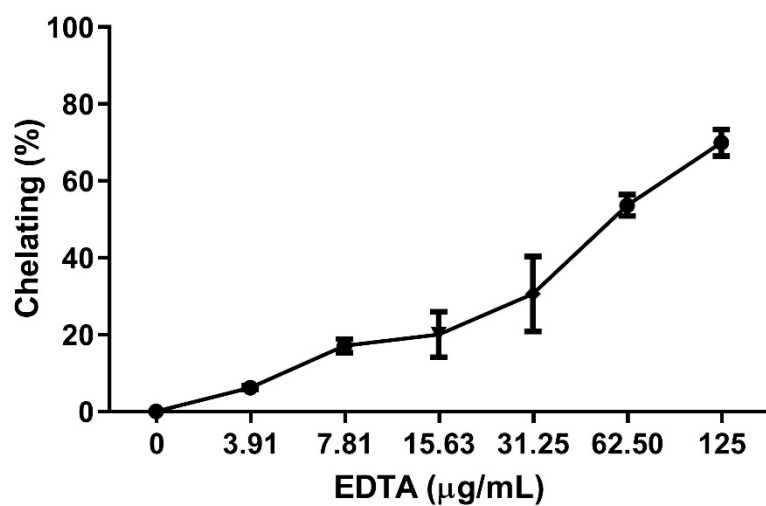

**Figure S2.** Ethylenediaminetetraacetic acid (EDTA) chelating rate in ferrozine ion chelating activity assay. The IC<sub>50</sub> of EDTA is 58.24 µg/mL. The data are presented as mean ± SD (n = 2).
